# Supplementary material for: Fabrication of Needle-Like Silicon Nanowires by Using a Nanoparticles-Assisted Bosch Process for Both High Hydrophobicity and Anti-Reflection
Source: MDPI journal article supplement (doi:10.3390/mi12091009), 2021-08-25
Supplement: s1 [file s1]

Supporting Information

Fabrication of needle-like silicon nanowires by using a nano-particles-assisted Bosch process for both high hydrophobicity and anti-reflection

Zengxing Zhang <sup>1</sup>, Guohua Liu <sup>2</sup> and Kaiying Wang <sup>1,\*</sup>

- <sup>1</sup> Department of microsystems, University of South-Eastern Norway, Horten, 3184, Norway; zengxingzhang88@163.com
- <sup>2</sup> Beijing Key Laboratory of Multiphase Flow and Heat Transfer for Low Grade Energy Utilization, North China Electric Power University, Beijing, 102206, China; liuguohua126@126.com
- \* Correspondence: kaiying.wang@usn.no

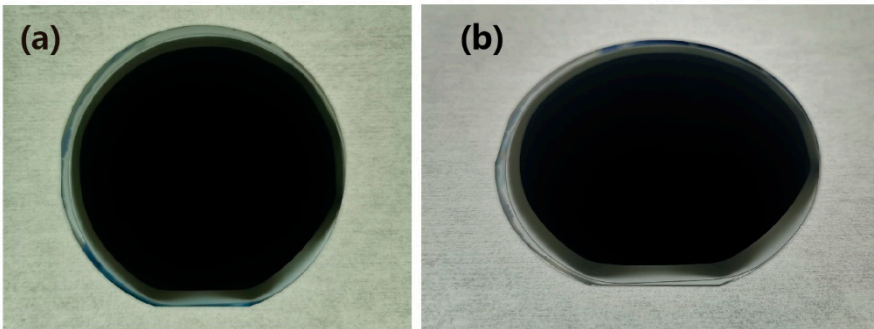

**Figure S1.** Digital photographs of the 4-inch wafer of the silicon nanowires formed through 120 etching loops. (a) Top view, (b) Tilted view.

**Table S1.** Nanoparticles-assisted Bosch process.

| Items                                | Sample-120 etching loops           |
|--------------------------------------|------------------------------------|
| Etch depth                           | 3~3.5 $\mu\text{m}$                |
| Etch rate / $\mu\text{m}/\text{min}$ | $\sim 0.75 \mu\text{m}/\text{min}$ |
| Scallops / nm                        | $\sim 25 \text{ nm}$               |
| Profile control                      | $90\pm 1^\circ$                    |
| Wafer uniformity                     | Good                               |

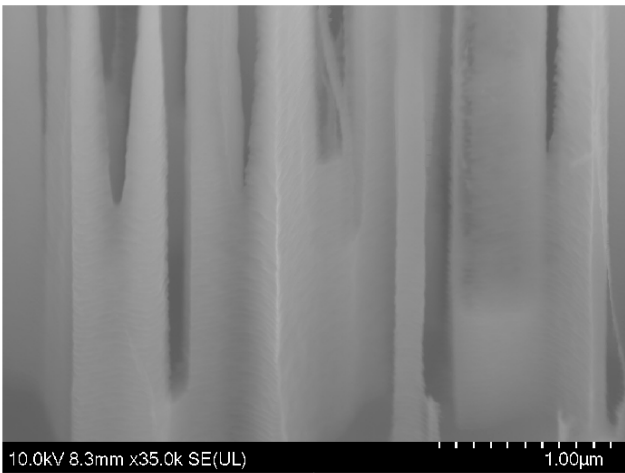

**Figure S2.** The SEM image at high magnification, indicating the smooth sidewalls and the Bosch scallops with the height of  $\sim 25 \text{ nm}$ .

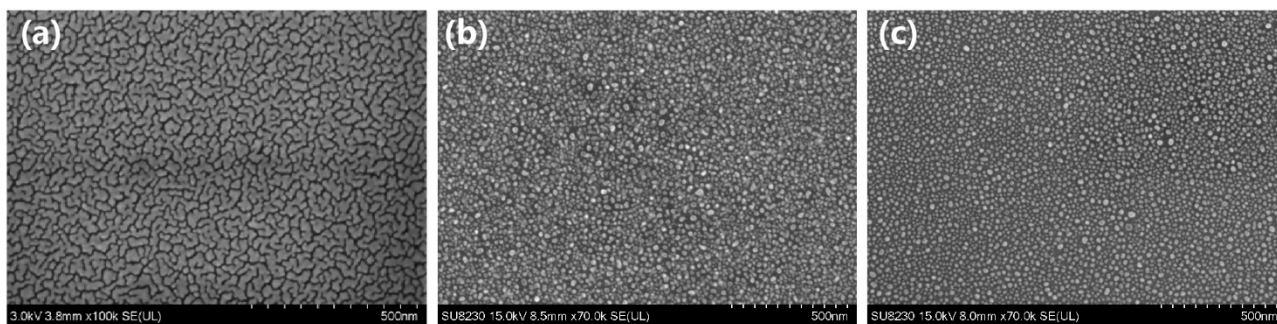

**Figure S3.** The SEM images of the nanoparticle masks before etching treatment. (a) The 4 nm Au film without thermal annealing treatment. (b) The nanoparticles formed by 4 nm Au film and thermal annealing at 500 °C for one hour. (c) The nanoparticles formed by 4 nm Au film and thermal annealing at 600 °C for one hour.

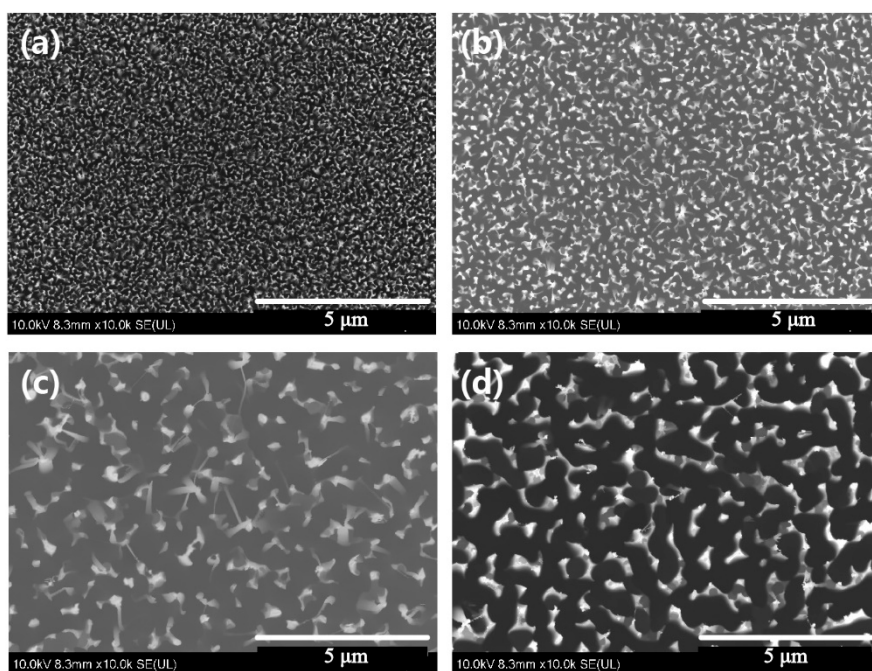

**Figure S4.** (a–d) SEM images at high magnification of the nanowires formed through 160 etching loops, the particle masks are formed by 4, 6, 8, and 10 nm Au film, respectively.

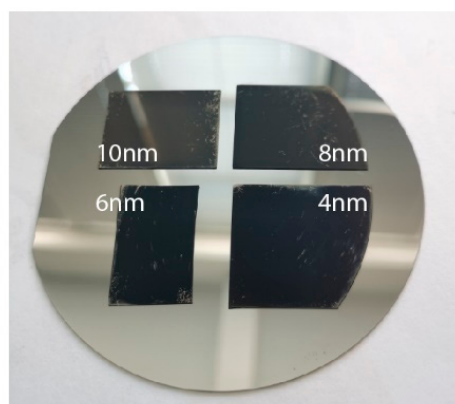

**Figure S5.** Digital photographs of the nanowires formed through 160 etching loops, the particle masks are formed by 4, 6, 8, and 10 nm Au film, respectively.

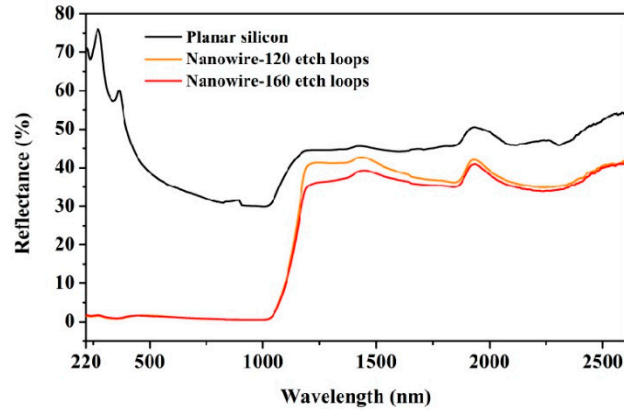

**Figure S6.** The reflectance spectra of the polished silicon surface and the nanowire ones formed by 4 nm film. The nanowires are formed through 120 and 160 etch loops, respectively, while the planar silicon is used as the reflectance. reference.

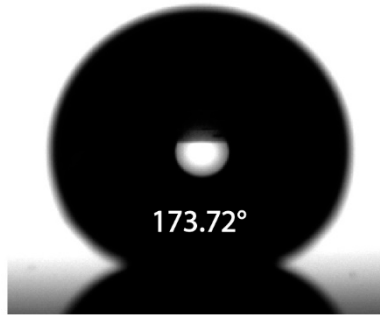

**Figure S7.** Contact angle of the silicon nanowire surface formed by 4 nm Au film and 180 etching loops.

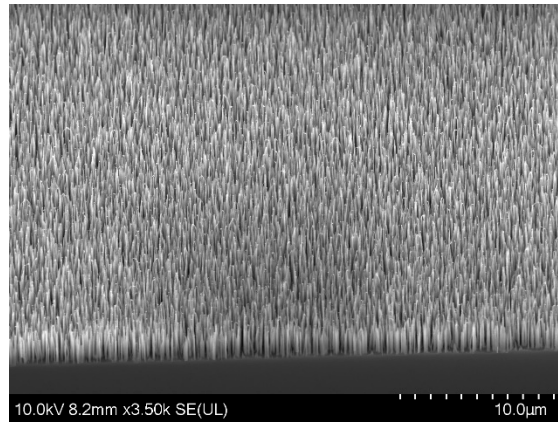

**Figure S8.** SEM image of the tilted view of the silicon nanowire array after striking by five thousand water droplets continuously.

**Video S1.** The whole process of the water droplet with 1.5  $\mu\text{l}$  bouncing on the horizontal nanowire surface.

**Video S2.** The whole process of the water droplet with 1.5  $\mu\text{l}$  bouncing on the inclined nanowire surface.
